# Supplementary material for: Target SSR-Seq: A Novel SSR Genotyping Technology Associate With Perfect SSRs in Genetic Analysis of Cucumber Varieties
Source: Front Plant Sci. 2019 Apr 24;10:531. doi: 10.3389/fpls.2019.00531 (PMC6492046; doi:10.3389/fpls.2019.00531)
Supplement: TABLE S1 — Information of 382 cucumber varieties in Chinese market. [file Table_1.XLSX]

## Sheet: Sheet1
Table S1. Information of 382 cucumber varieties in Chinese market
Code	Varieties Name	source
HG1	Jin you yi	the seed department of the Chinese government
HG2	Yuan feng yuan 6	the seed department of the Chinese government
HG3	Mi ci wang huang gua	the seed department of the Chinese government
HG4	Zhai bu bai lu di wang	the seed department of the Chinese government
HG5	Xin yan si	the seed department of the Chinese government
HG6	P01	the seed department of the Chinese government
HG7	Jin you 303	the seed department of the Chinese government
HG8	Bo mei 10	the seed department of the Chinese government
HG9	Z298 2013.11	the seed department of the Chinese government
HG10	Sheng feng 908	the seed department of the Chinese government
HG11	Xin jin chun si	the seed department of the Chinese government
HG12	Bo mei 5032	the seed department of the Chinese government
HG13	Qiang han jie jie	the seed department of the Chinese government
HG14	Xin xia feng yi	the seed department of the Chinese government
HG15	P02	the seed department of the Chinese government
HG16	Jin yan si	the seed department of the Chinese government
HG17	H4 16.10.20	the seed department of the Chinese government
HG18	De rui te 29	the seed department of the Chinese government
HG19	HG-3-F9	the seed department of the Chinese government
HG20	Bei jing 204	the seed department of the Chinese government
HG21	You liang wang zhong wang	the seed department of the Chinese government
HG22	CC3	the seed department of the Chinese government
HG23	Jin you 35	the seed department of the Chinese government
HG24	Lv bo shi yi	the seed department of the Chinese government
HG25	Jing feng 298	the seed department of the Chinese government
HG26	Zhong nong 18	the seed department of the Chinese government
HG27	Jin za 2	the seed department of the Chinese government
HG28	Jin you 401	the seed department of the Chinese government
HG29	Tang shan cui bao F1	the seed department of the Chinese government
HG30	Zhong nong 27	the seed department of the Chinese government
HG31	A25	Xishuangbanna
HG32	Xing yan si	the seed department of the Chinese government
HG33	Jing yan you sheng	the seed department of the Chinese government
HG34	Jin you 308	the seed department of the Chinese government
HG35	Zhong nong 10	the seed department of the Chinese government
HG36	De rui te D19	the seed department of the Chinese government
HG37	De rui te huang gua GZ1603	the seed department of the Chinese government
HG38	H1	breeders
HG39	Jin you 38	the seed department of the Chinese government
HG40	Jin you 108	the seed department of the Chinese government
HG41	1364 2014.11	breeders
HG42	Chuan cui 3	the seed department of the Chinese government
HG43	You liang 3-6	the seed department of the Chinese government
HG44	Hua nai H1104	the seed department of the Chinese government
HG45	Dong fang xiu	the seed department of the Chinese government
HG46	Nan ci 3	the seed department of the Chinese government
HG47	9930	breeders
HG48	Zhong nong 3	the seed department of the Chinese government
HG49	Lu huang gua 9	the seed department of the Chinese government
HG50	Chun xi F1	the seed department of the Chinese government
HG51	Hui ying 15	the seed department of the Chinese government
HG52	De rui te huang gua L14-5	the seed department of the Chinese government
HG53	Jing yan xia mei	the seed department of the Chinese government
HG54	Nan ci 2	the seed department of the Chinese government
HG55	Bei jing 403	the seed department of the Chinese government
HG56	Bei nong jia xiu	the seed department of the Chinese government
HG57	De rui te 79	the seed department of the Chinese government
HG58	128yi dai za zhong	the seed department of the Chinese government
HG59	Bei jing bai yu san	the seed department of the Chinese government
HG60	787B	the seed department of the Chinese government
HG61	Qian de 2	the seed department of the Chinese government
HG62	21hun 16.10.26	the seed department of the Chinese government
HG63	Hei you liang 507	the seed department of the Chinese government
HG64	De rui te huang gua L14-2	the seed department of the Chinese government
HG65	Chang chun mi ci	the seed department of the Chinese government
HG66	De rui te 10	the seed department of the Chinese government
HG67	A12	Xishuangbanna
HG68	Hei you liang 999	the seed department of the Chinese government
HG69	Zhong nong 37	the seed department of the Chinese government
HG70	De rui te Y2	the seed department of the Chinese government
HG71	Ou zhou yi	the seed department of the Chinese government
HG72	Jing AK18	the seed department of the Chinese government
HG73	Cui li	the seed department of the Chinese government
HG74	Xing yan dong	the seed department of the Chinese government
HG75	Bo mei 11	the seed department of the Chinese government
HG76	Nan ci 1	the seed department of the Chinese government
HG77	Zhong nong 8	the seed department of the Chinese government
HG78	Yin pei 88 F1	the seed department of the Chinese government
HG79	De rui te 727	the seed department of the Chinese government
HG80	Lv bo qi	the seed department of the Chinese government
HG81	Jin wang 615-4	the seed department of the Chinese government
HG82	Bo zhong lv you huang gua	the seed department of the Chinese government
HG83	Jin you 358	the seed department of the Chinese government
HG84	Jin pei 99-1 F1	the seed department of the Chinese government
HG85	De rui te 7876	the seed department of the Chinese government
HG86	Qian de 777	the seed department of the Chinese government
HG87	De rui te 80	the seed department of the Chinese government
HG88	Jin you 48	the seed department of the Chinese government
HG89	Zhong yan 17F1	the seed department of the Chinese government
HG90	Chun hua 1	the seed department of the Chinese government
HG91	Jing yan chun mei	the seed department of the Chinese government
HG92	De rui te 15-10 mi ci huang gua	the seed department of the Chinese government
HG93	Jing yan 118	the seed department of the Chinese government
HG94	Shui guo xing 101	the seed department of the Chinese government
HG95	Sui ling lao lai s	the seed department of the Chinese government
HG96	Zhong nong 20	the seed department of the Chinese government
HG97	Lv xiu	the seed department of the Chinese government
HG98	Jing yan qiu mei	the seed department of the Chinese government
HG99	Zhong yan 23 F1	the seed department of the Chinese government
HG100	H32	breeders
HG101	Hu gua	Chinese markert
HG102	Jin you 4069	the seed department of the Chinese government
HG103	Lv chun dong	the seed department of the Chinese government
HG104	Lv cui bao	the seed department of the Chinese government
HG105	De rui te	the seed department of the Chinese government
HG106	Jin dong ke run 99 mi ci huang gua	the seed department of the Chinese government
HG107	Shou cai HG1	the seed department of the Chinese government
HG108	116 2016.8	Xishuangbanna
HG109	Lu huang gua san	breeders
HG110	A8	Xishuangbanna
HG111	Jin pei 98-1 F1	the seed department of the Chinese government
HG112	Jing bai yu c bai ye san	the seed department of the Chinese government
HG113	Tang shan qiu gua	the seed department of the Chinese government
HG114	Jin wang 203	the seed department of the Chinese government
HG115	Tian jiao qi	the seed department of the Chinese government
HG116	Ning feng 09	the seed department of the Chinese government
HG117	Ye sheng xing 407 16.10.31	the seed department of the Chinese government
HG118	Ji za 9	the seed department of the Chinese government
HG119	Lv fei cui	the seed department of the Chinese government
HG120	Bo mei 517	the seed department of the Chinese government
HG121	Jin you 20-11	the seed department of the Chinese government
HG122	Jie jie dong	Chinese markert
HG123	Tian jiao ba	Chinese markert
HG124	Qi jian 1	Chinese markert
HG125	509-1 2014.11	breeders
HG126	Lv chun yi	Chinese markert
HG127	Chun mei	Chinese markert
HG128	Ji 6	Chinese markert
HG129	A23	Xishuangbanna
HG130	Ao guang	Chinese markert
HG131	Zhong nong 12	Chinese markert
HG132	A20 16.11.1	Xishuangbanna
HG133	Jin you 316	Chinese markert
HG134	Yu fei cui	Chinese markert
HG135	Shou cai HG2	Chinese markert
HG136	Man guan	Chinese markert
HG137	Dong nong 806	Chinese markert
HG138	Jing yan han bao 5	Chinese markert
HG139	Xin jin chun si	Chinese markert
HG140	Jin pei 98	Chinese markert
HG141	Bo mei 28	Chinese markert
HG142	Tian yi	Chinese markert
HG143	Shuo feng 5	Chinese markert
HG144	Tian kang zhong guo long	Chinese markert
HG145	Bo mei 6913	Chinese markert
HG146	Ying liang cui yu xiang	Chinese markert
HG147	Jin pei 99-2	Chinese markert
HG148	Jing yan 106	Chinese markert
HG149	Rui guang dong	Chinese markert
HG150	Tang chun 100	Chinese markert
HG151	Shuo jiu	Chinese markert
HG152	Zhong yan 19 F1	Chinese markert
HG153	Ji za 16	Chinese markert
HG154	Tang shan qiu mei	Chinese markert
HG155	Lv bao zhu 8	Chinese markert
HG156	R74	Chinese markert
HG157	Hai nuo yi	Chinese markert
HG158	Te xuan ji za si	Chinese markert
HG159	Zhong nong 9	Chinese markert
HG160	Jun you 66huang gua	Chinese markert
HG161	R8	breeders
HG162	Qi jian 2	Chinese markert
HG163	Fei cui zhai bu bai	Chinese markert
HG164	Qing shuang	Chinese markert
HG165	Jun ke shi ba	Chinese markert
HG166	Jin pei 99-3 F1	Chinese markert
HG167	Bai jing ling 2	Chinese markert
HG168	Jing yan lv ling long 2	Chinese markert
HG169	Tian jiao 7	Chinese markert
HG170	Shuo feng ba	Chinese markert
HG171	761	Chinese markert
HG172	Jin pei 99 F1	Chinese markert
HG173	A18	Xishuangbanna
HG174	Han guo huang gua	Chinese markert
HG175	Jian ce 7	Chinese markert
HG176	CK3	Chinese markert
HG177	You jia quan ci 09	Chinese markert
HG178	Jian ce 6	Chinese markert
HG179	Gu yu jia li	Chinese markert
HG180	C yue huang gua F1	Chinese markert
HG181	Yu nv	Chinese markert
HG182	1006-1 2014.11	Chinese markert
HG183	13AC049	Chinese markert
HG184	Chun wang 9801	Chinese markert
HG185	Jin tong	Chinese markert
HG186	A11	Xishuangbanna
HG187	Jing yan 107	Chinese markert
HG188	Gu yu mei li xin xing	Chinese markert
HG189	A1	Xishuangbanna
HG190	DS2121	Chinese markert
HG191	Hua qing da diao gua	Chinese markert
HG192	C05-016	Chinese markert
HG193	Ma sha huang gua 腌zi xing	Chinese markert
HG194	Mei ci 09	Chinese markert
HG195	Ben di wang huang gua	Chinese markert
HG196	Jing yan mi ni 1	Chinese markert
HG197	Ben di wang	Chinese markert
HG198	WI2757	Chinese markert
HG199	Qing mei	Chinese markert
HG200	Jing yan yan zi bao	Chinese markert
HG201	A24	Xishuangbanna
HG202	PS050	Chinese markert
HG203	Bai gui fei shui guo huang gua	Chinese markert
HG204	Liang li	Chinese markert
HG205	17	Xishuangbanna
HG206	Hua yan li ren shui guo huang gua	Chinese markert
HG207	A30	Xishuangbanna
HG208	15-1	Xishuangbanna
HG209	627	Chinese markert
HG210	7-1	Xishuangbanna
HG211	28	Xishuangbanna
HG212	Jin shan lao huang gua	Chinese markert
HG213	Ji za mi ni	Chinese markert
HG214	34	Xishuangbanna
HG215	He han	Chinese markert
HG216	H9 16.10.10	breeders
HG217	Qian de 1217	Chinese markert
HG218	Lv jing ling 3	Chinese markert
HG219	Ning jia 3	Chinese markert
HG220	11-2	Xishuangbanna
HG221	Lv jing ling 5	Chinese markert
HG222	83-ms702	Chinese markert
HG223	A50 16.10.20	Xishuangbanna
HG224	A49	Xishuangbanna
HG225	Bi yu 2	Chinese markert
HG226	22	Xishuangbanna
HG227	38	Xishuangbanna
HG228	Kang de (Condesa)RZ F1	breeders
HG229	39	Xishuangbanna
HG230	Lv jing ling 2	breeders
HG231	40	Xishuangbanna
HG232	Chun qiu wang 2	breeders
HG233	Jing yan mi ni 5	breeders
HG234	Jing yan mi ni 9	breeders
HG235	Dai dong xing （Deltastar）	breeders
HG236	SM 2013.7	breeders
HG237	CU001	breeders
HG238	27	Xishuangbanna
HG239	A28	Xishuangbanna
HG240	PI197088	breeders
HG241	Chun qiu wang 3	breeders
HG242	HG-3-C3	breeders
HG243	Zhong yan mi 8 F1	breeders
HG244	13	Xishuangbanna
HG245	Mi ni 3	breeders
HG246	Dai an na	breeders
HG247	12-1	Xishuangbanna
HG248	Hang yi 1	Chinese markert
HG249	A21	Xishuangbanna
HG250	Ya mei te （tai guo jin kou ）	breeders
HG251	I1an	breeders
HG252	13AC230	breeders
HG253	10-1	Xishuangbanna
HG254	Si tuo ke 9006	breeders
HG255	23	Xishuangbanna
HG256	AMATA765	breeders
HG257	Jing yan mi ni 4	breeders
HG258	6-1	Xishuangbanna
HG259	Zhong nong 29	the seed department of the Chinese government
HG260	True lemon	breeders
HG261	Shen lv 72	breeders
HG262	CU002	breeders
HG263	Bei sha	breeders
HG264	Lv cui	breeders
HG265	Virginia	breeders
HG266	Jin you 1	breeders
HG267	Bai ma wang zi	breeders
HG268	Bao za 2	breeders
HG269	Bi yu	breeders
HG270	Bo mei 8	breeders
HG271	Chun yu	breeders
HG272	CUCUMBER1404	breeders
HG273	Cui long	breeders
HG274	Cui lv	breeders
HG275	Cui mei shui guo huang gua	breeders
HG276	De dong LD-1	breeders
HG277	De dong LD-3	breeders
HG278	De rui te F16	breeders
HG279	De rui te Y8	Chinese markert
HG280	Ding you liang zhong cha wang	breeders
HG281	Dong li	breeders
HG282	Dong nong 804	the seed department of the Chinese government
HG283	Hu za 6	breeders
HG284	Jian ce 2	breeders
HG285	Jian ce 3	breeders
HG286	Jin chun 4	breeders
HG287	Jin you 12	breeders
HG288	Jin you 2	breeders
HG289	Jin you 31	breeders
HG290	Jin you 35	breeders
HG291	Jin you 36	breeders
HG292	Jin you 38	breeders
HG293	Jin you 409	Chinese markert
HG294	Jing A008	breeders
HG295	Jing AK42	breeders
HG296	Jing yan mi ni 2	the seed department of the Chinese government
HG297	Jing yan mi ni 3	the seed department of the Chinese government
HG298	Lv jing ling 4	breeders
HG299	Lv yi tian shi	breeders
HG300	MC2065	breeders
HG301	Mei feng gua wang	breeders
HG302	Ning xing quan neng chun qiu F1	breeders
HG303	Ning yun 3	breeders
HG304	Ri ben bei xing	breeders
HG305	Shen lv 64	breeders
HG306	Xian dai xin wu	breeders
HG307	Xuan si	breeders
HG308	You liang 107	breeders
HG309	You lv wang zi	breeders
HG310	Zhong nong 15	breeders
HG311	Zhong nong 19	breeders
HG312	Zhong nong 26	breeders
HG313	Zhong nong 50	Chinese markert
HG314	Zhong nong 6	breeders
HG315	Zhuang gua	breeders
HG316	P1	breeders
HG317	P2	breeders
HG318	P3	breeders
HG319	P4	breeders
HG320	P5	breeders
HG321	P6	breeders
HG322	P7	breeders
HG323	P8	breeders
HG324	P9	breeders
HG325	P10	breeders
HG326	P11	breeders
HG327	P12	breeders
HG328	P13	breeders
HG329	P14	breeders
HG330	P15	breeders
HG331	P16	breeders
HG332	P17	breeders
HG333	P18	breeders
HG334	P19	breeders
HG335	P20	breeders
HG336	P21	breeders
HG337	P22	breeders
HG338	P23	breeders
HG339	P24	breeders
HG340	P25	breeders
HG341	P26	breeders
HG342	P27	breeders
HG343	P28	breeders
HG344	P29	breeders
HG345	P30	breeders
HG346	P31	breeders
HG347	P32	breeders
HG348	P33	breeders
HG349	P34	breeders
HG350	P35	breeders
HG351	P36	breeders
HG352	P37	breeders
HG353	P38	breeders
HG354	P39	breeders
HG355	P40	breeders
HG356	P41	breeders
HG357	P42	breeders
HG358	P43	breeders
HG359	P44	breeders
HG360	P45	breeders
HG361	P46	breeders
HG362	P47	breeders
HG363	P48	breeders
HG364	P49	breeders
HG365	P50	breeders
HG366	P51	breeders
HG367	P52	breeders
HG368	P53	breeders
HG369	P54	breeders
HG370	P55	breeders
HG371	P56	breeders
HG372	P57	breeders
HG373	P58	breeders
HG374	P59	breeders
HG375	P60	breeders
HG376	P61	breeders
HG377	P62	breeders
HG378	P63	breeders
HG379	P64	breeders
HG380	P65	breeders
HG381	P66	breeders
HG382	P67	breeders
